# Supplementary material for: A novel magnetic HS−-adsorptive nanocomposite photocatalyst (rGO/CoMn2O4–MgFe2O4) for hydrogen fuel production using H2S feed
Source: Royal Society of Chemistry journal article supplement (doi:10.1039/d3ma00668a), 2023-01-01
Supplement: d3ma00668a1.pdf [file d3ma00668a1.pdf]

## Supplementary Information

# Novel magnetic HS<sup>-</sup>-adsorptive nanocomposite photocatalyst (rGO/CoMn<sub>2</sub>O<sub>4</sub>-MgFe<sub>2</sub>O<sub>4</sub>) for hydrogen fuel production using H<sub>2</sub>S feed

*Majid Ghanimati*<sup>a</sup>, *Mohsen Lashgari*<sup>\* a,b</sup>, *Fabio Montagnaro*<sup>c</sup>, *Vassilios Binas*<sup>d</sup>, *Michalis  
Konsolakis*<sup>e</sup>, *Marco Balsamo*<sup>c</sup>

<sup>a</sup> Department of Chemistry, Institute for Advanced Studies in Basic Sciences (IASBS), Zanjan  
45137-66731, Iran

<sup>b</sup> Center for Research in Climate Change and Global Warming: Hydrogen and solar division,  
Zanjan 45137-66731, Iran

<sup>c</sup> Department of Chemical Sciences, University of Naples Federico II, Complesso Universitario  
di Monte Sant'Angelo, 80126 Napoli, Italy

<sup>d</sup> Institute of Electronic Structure and Laser (IESL), FORTH, Vasilika Vouton, GR-  
70013 Heraklion, Greece

<sup>e</sup> School of Production Engineering and Management, Technical University of Crete, GR-73100,  
Chania, Greece

\* Corresponding author. Tel.: +98 24 33153205; fax: +98 24 33153232. *E-mail address:*

[Lashgari@iasbs.ac.ir](mailto:Lashgari@iasbs.ac.ir)

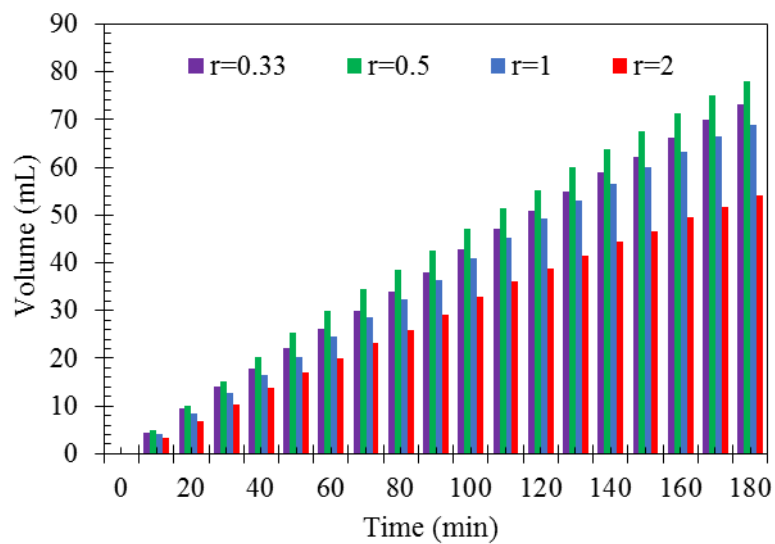

**Figure S1.** The ability of the  $x\text{CoMn}_2\text{O}_4\text{-}y\text{MgFe}_2\text{O}_4$  composite photocatalysts synthesized in this work ( $r = \frac{x}{y}$ : 0.33, 0.5, 1, and 2) to produce hydrogen gas [T=298 K, reaction medium: 50 mL alkaline  $\text{H}_2\text{S}$  feed ( $\text{pH}=11$ ), photocatalyst mass: 0.2 g, light intensity: 1 sun].

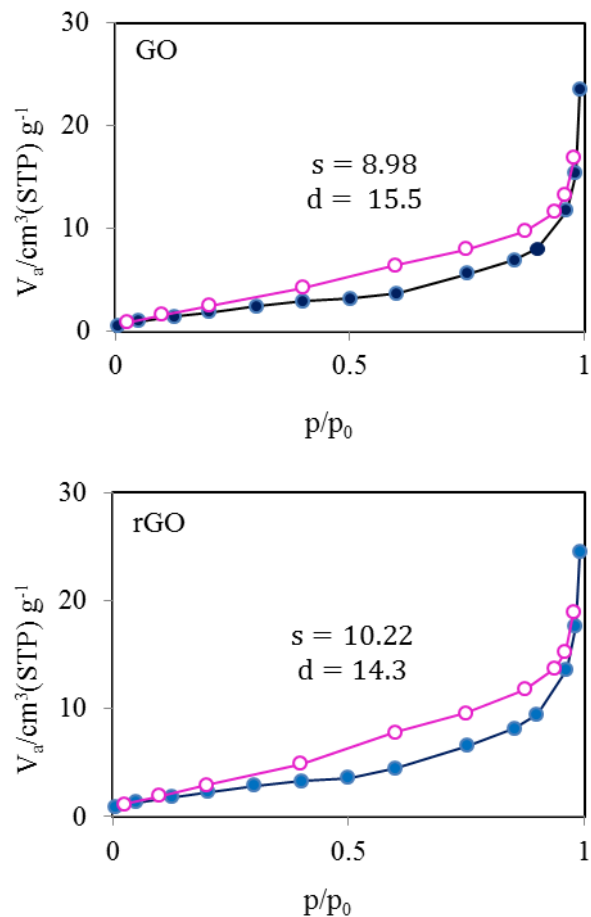

**Figure S2.** Nitrogen adsorption-desorption isotherms of GO and rGO ( $s$ : surface area ( $\text{m}^2 \text{ g}^{-1}$ ),  $d$ : mean pore diameter (nm). Solid and hollow circles are standing for adsorption and desorption processes, respectively).

The above diagrams show a hysteresis loop for both GO and rGO compounds. The observation of such a loop is a characteristic of mesoporous compounds (pore diameter: between 2 and 50 nm). The increase in surface area due to the conversion of GO to rGO, has also been witnessed elsewhere [see refs 59 and 60 of the main text].

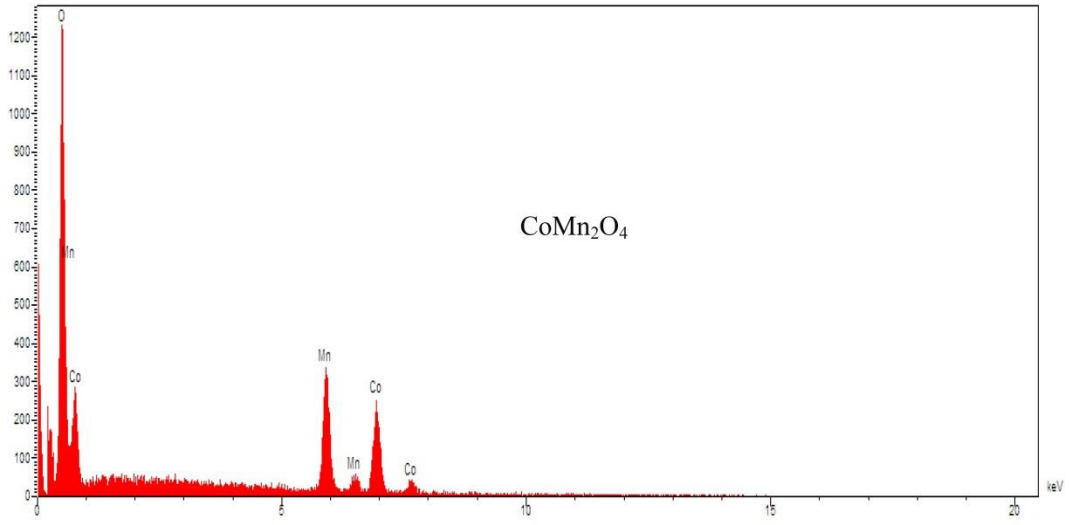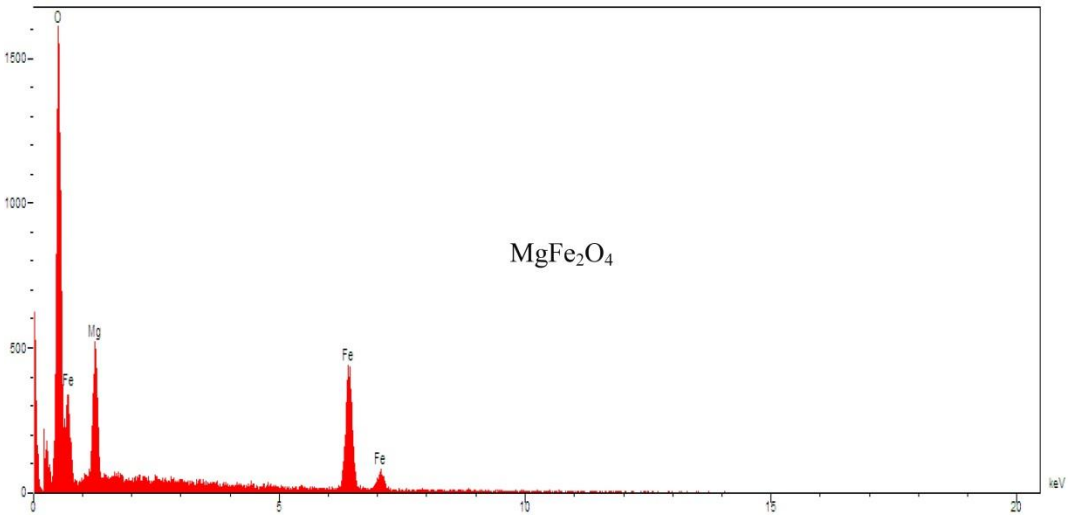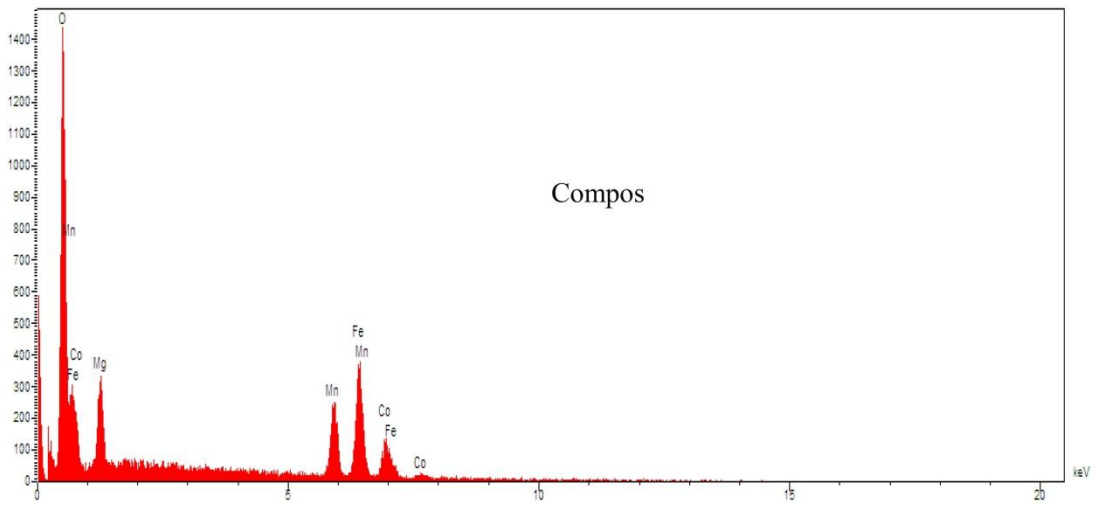

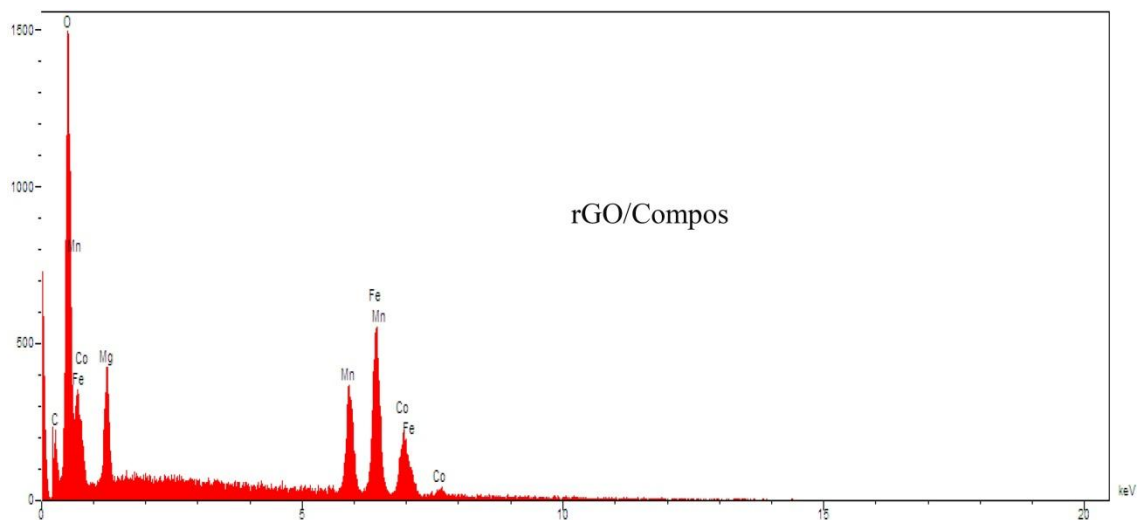

**Figure S3.** Energy dispersive X-ray (EDX) spectra of the  $\text{CoMn}_2\text{O}_4$  and  $\text{MgFe}_2\text{O}_4$  as well as their composite in the absence and presence of reduced graphene oxide (rGO).

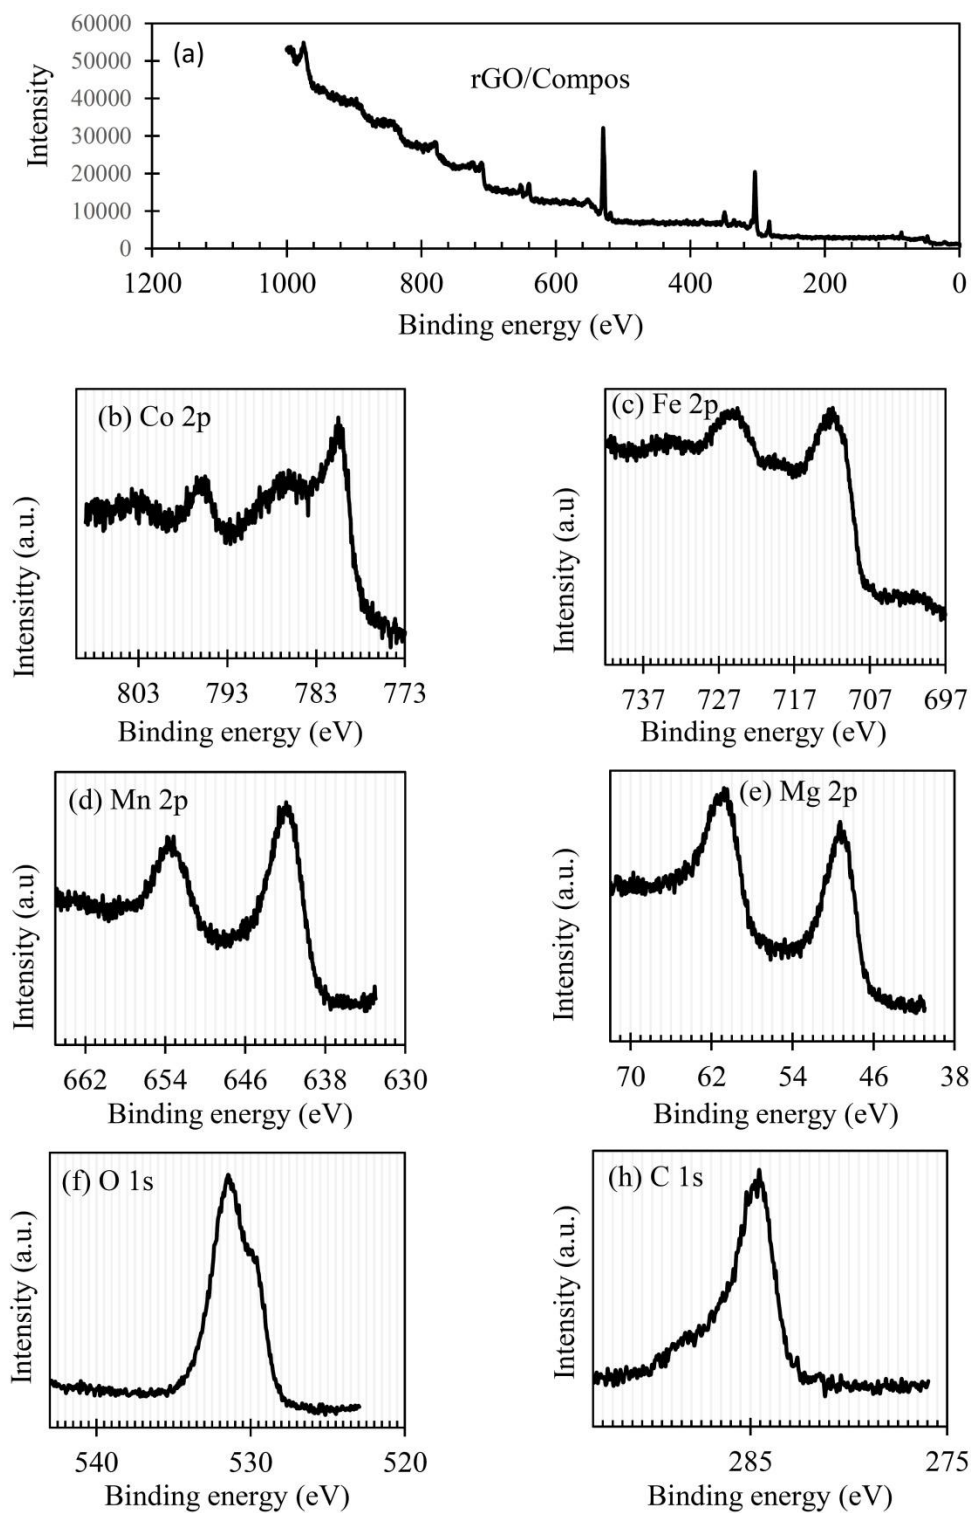

**Figure S4.** XPS spectra of the composite rGO/Compos photocatalyst: (a) survey, (b) Co, (c) Fe, (d) Mn, (e) Mg, (f) O, and (g) C spectra.

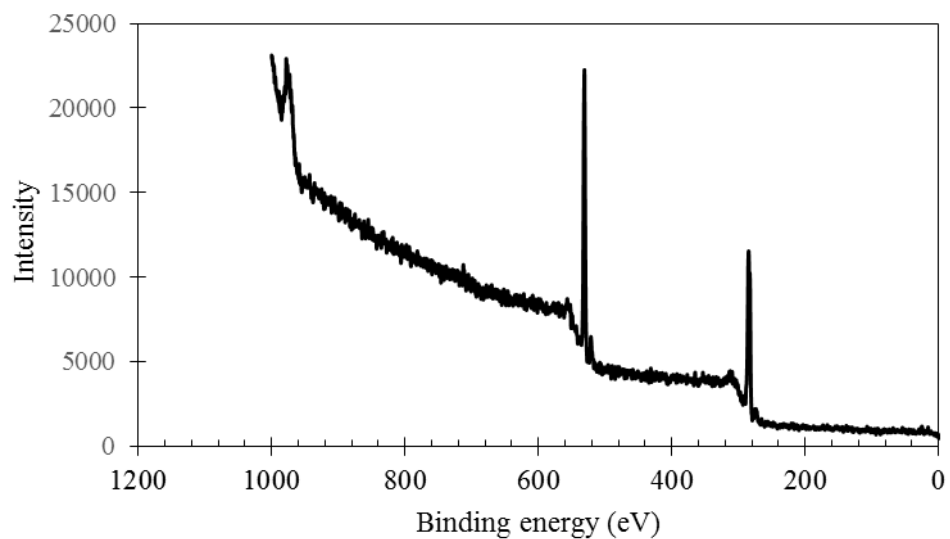

**Figure S5.** XPS survey of rGO.

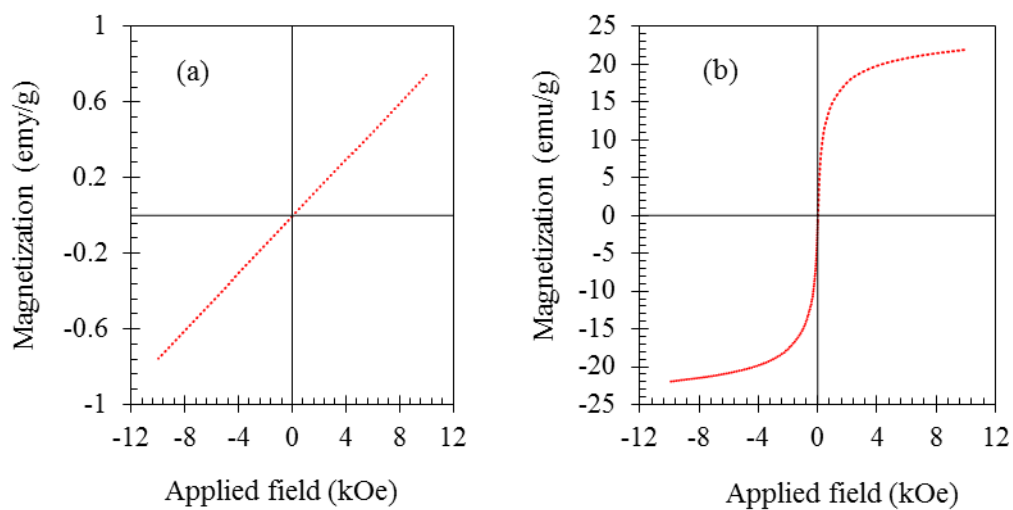

**Figure S6.** Magnetic hysteresis loop recorded for the Compos components, i.e.  $\text{CoMn}_2\text{O}_4$  (a) and  $\text{MgFe}_2\text{O}_4$  (b).

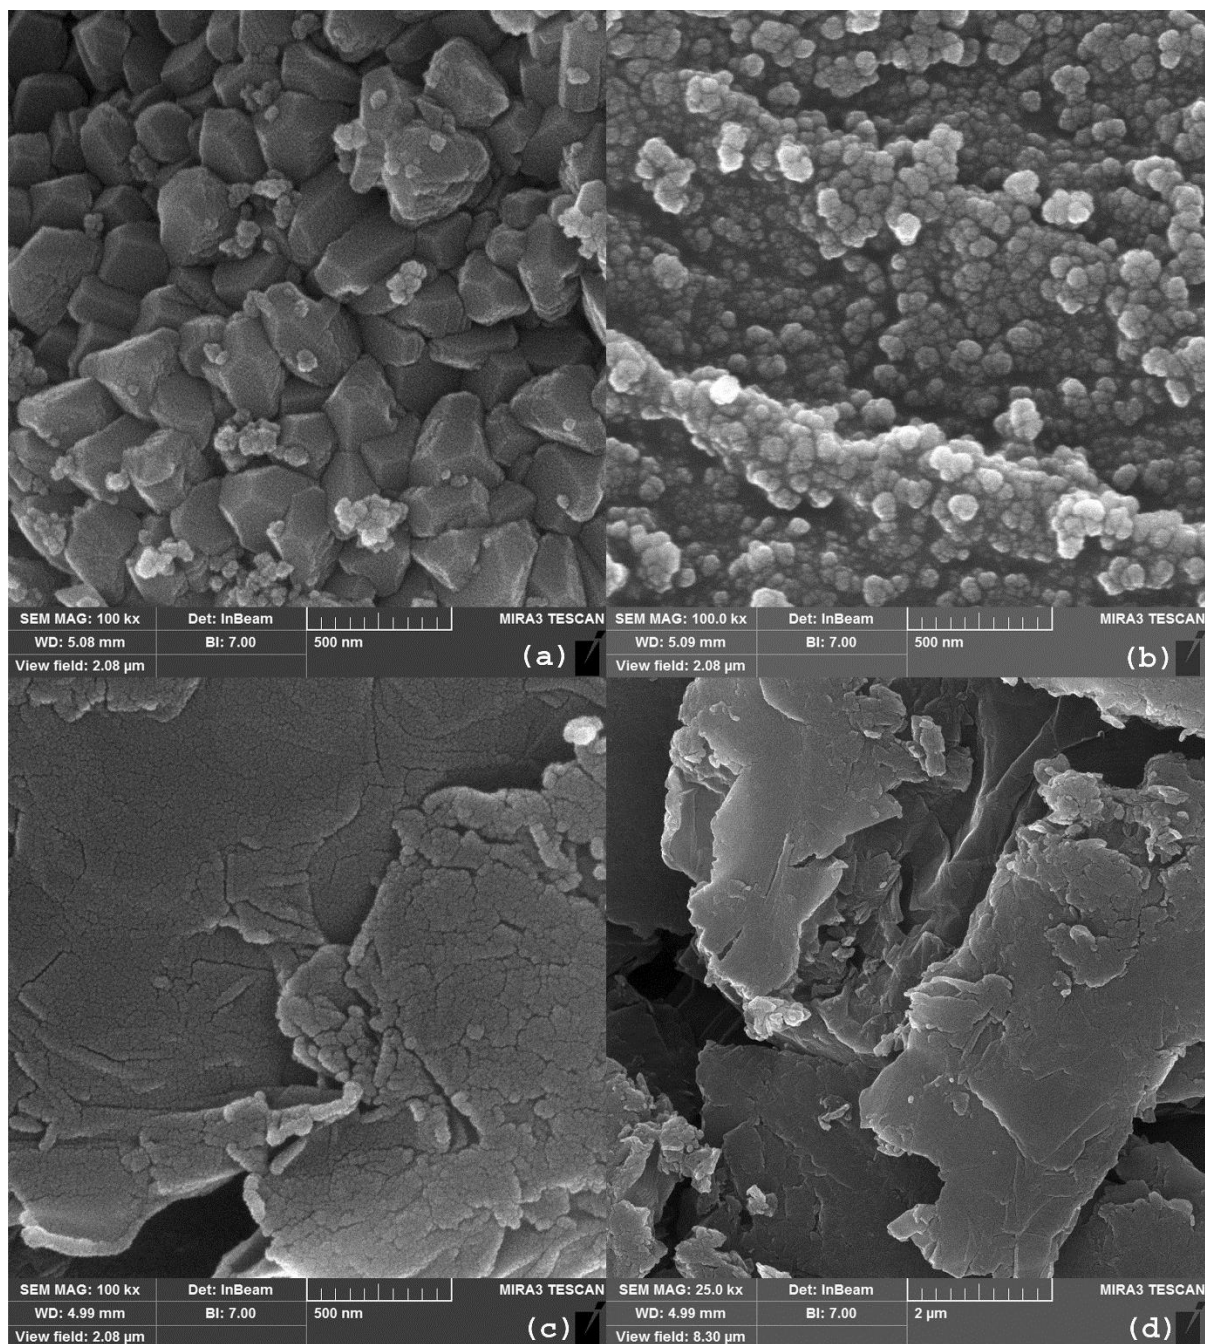

**Figure S7.** FESEM images of CoMn<sub>2</sub>O<sub>4</sub> (a), MgFe<sub>2</sub>O<sub>4</sub> (b), and GO (c, d).

This figure shows that the CoMn<sub>2</sub>O<sub>4</sub> synthesized in this work is composed of a series of polyhedral nanoparticles (**Fig. S7a**), and MgFe<sub>2</sub>O<sub>4</sub> consists of almost uniform nanoparticles (**Fig. S7b**). The graphene oxide (GO) has also a layered nano-flake/plate structure, stacked together (**Figs S7c and S7d**). The SEM images observed for these compounds are consistent with the structures reported in the literature [ref. 61 of the main text; C. Lin et al, *Nanomaterials* 9 (2019) 774; M. Kooti et al, *Appl. Microbiol. Biotechnol.* 102 (2018) 3607].



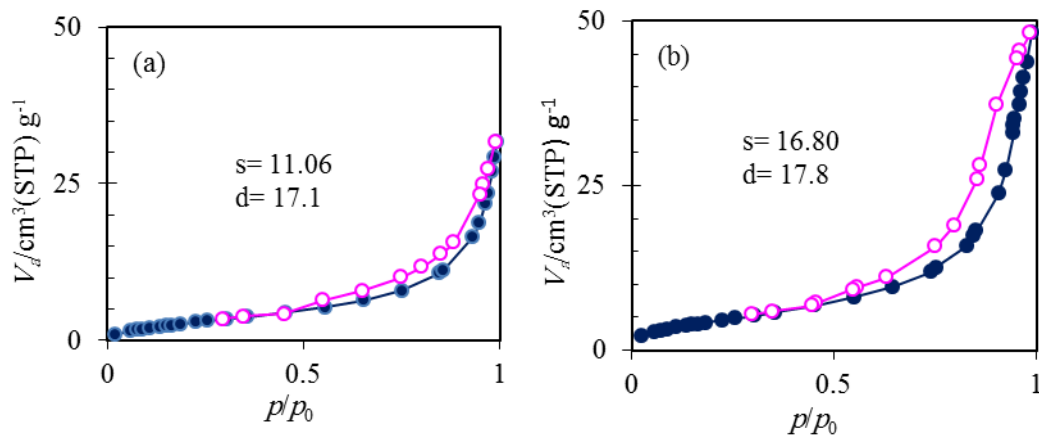

**Figure S8.** Nitrogen adsorption-desorption (BET) isotherms of  $\text{CoMn}_2\text{O}_4$  (a) and  $\text{MgFe}_2\text{O}_4$  (b) photocatalyst components ( $s$ : surface area ( $\text{m}^2 \text{ g}^{-1}$ ),  $d$ : mean pore diameter (nm)). In these diagrams, solid and hollow circles denote the  $\text{N}_2$  adsorption and desorption processes, respectively).

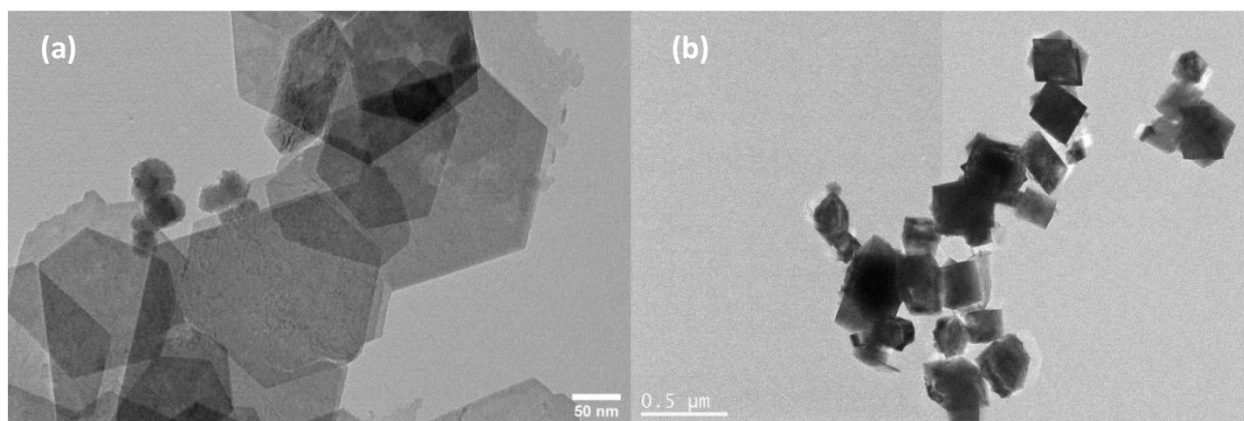

**Figure S9.** HRTEM images of the Compos components: a)  $\text{CoMn}_2\text{O}_4$  and b)  $\text{MgFe}_2\text{O}_4$ .

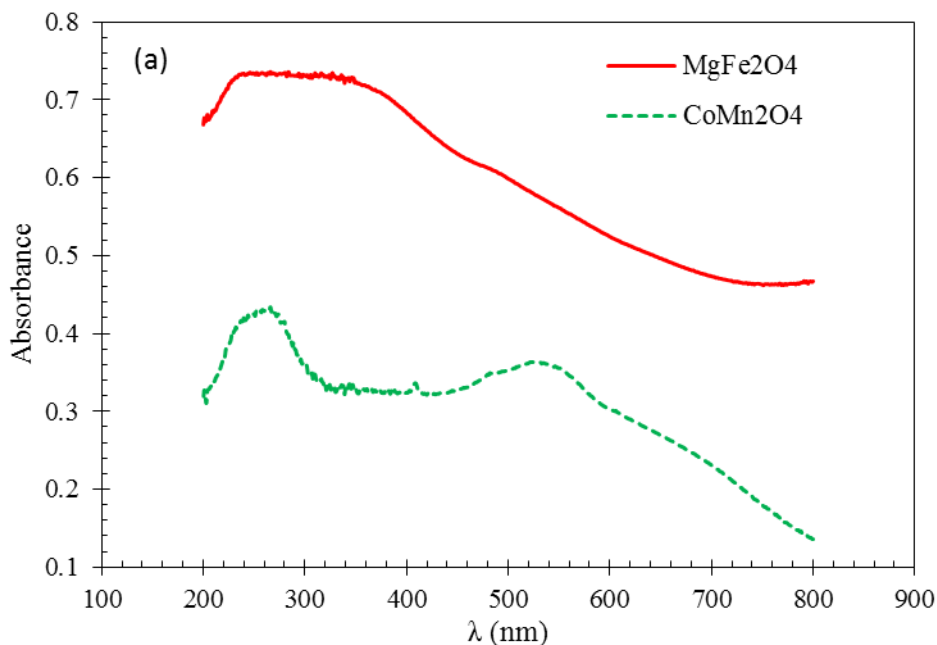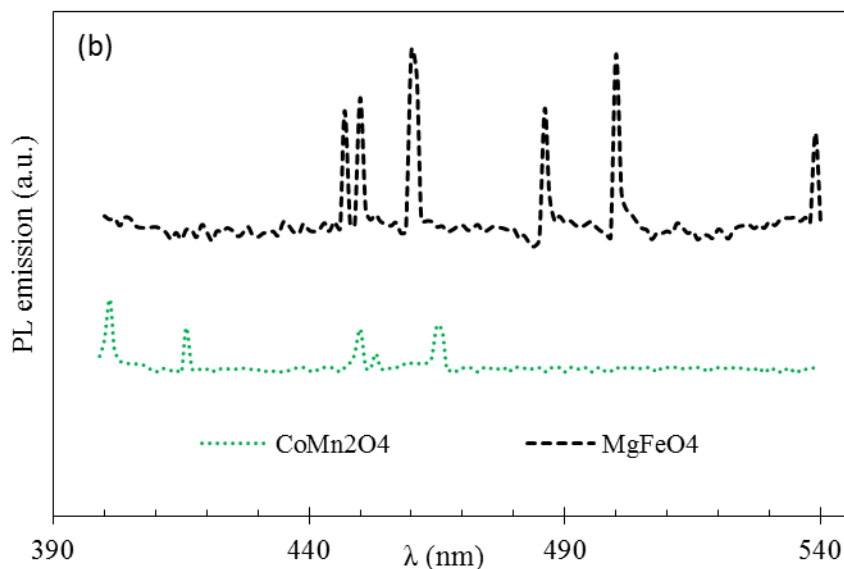

**Figure S10.** Diffuse reflectance (DR) UV-visible (a) and photoluminescence (PL; b) spectra of the photocatalyst components, i.e.  $\text{CoMn}_2\text{O}_4$  and  $\text{MgFe}_2\text{O}_4$ .

**Figure S10a** exhibits superior light absorbance for  $\text{MgFe}_2\text{O}_4$ . By contrast, a lower PL emission is observed for  $\text{CoMn}_2\text{O}_4$  (**Fig. S10b**), indicating less charge recombination for this compound compared to  $\text{MgFe}_2\text{O}_4$ . It should also be noted that the PL emission peaks observed for  $\text{MgFe}_2\text{O}_4$  (around 447, 450, 460, 486, 500, and 539 nm) and  $\text{CoMn}_2\text{O}_4$  (around 400, 416, 450, 453, 465 nm) are characteristic emissions of these compounds, reported in the literature [ref. 23 of the main text; N. Kaur et al, *Ceram. Int.* 44 (2018) 4158-4168; K. Shetty et al, *Physica B* 507 (2017) 67-75; G. Vaish et al, *J. Mater. Sci.: Mater. Electron.* 30 (2019) 16518-16526].

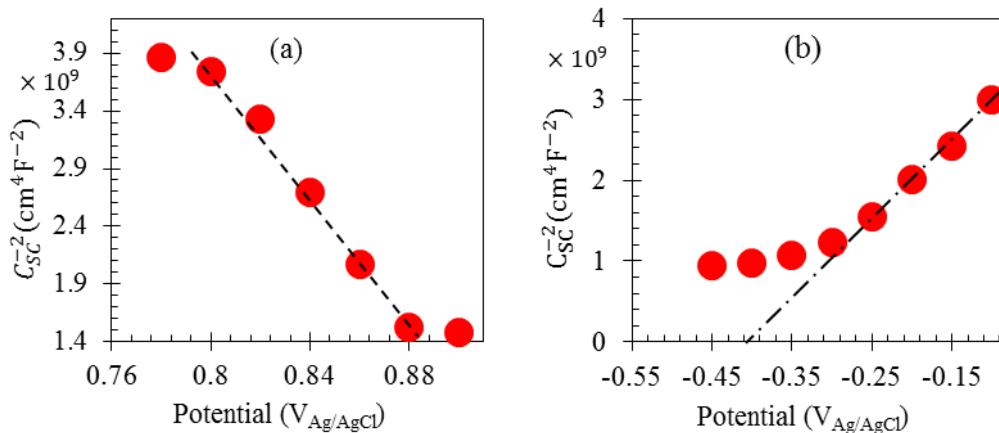

**Figure S11.** Mott–Schottky (MS) diagrams of the  $\text{CoMn}_2\text{O}_4$  (a) and  $\text{MgFe}_2\text{O}_4$  (b) semiconducting materials.

The negative and positive MS slopes observed for  $\text{CoMn}_2\text{O}_4$  and  $\text{MgFe}_2\text{O}_4$  clearly indicate that these materials are p- and n-type semiconductors, respectively (see refs 73 and 87 of the main text).

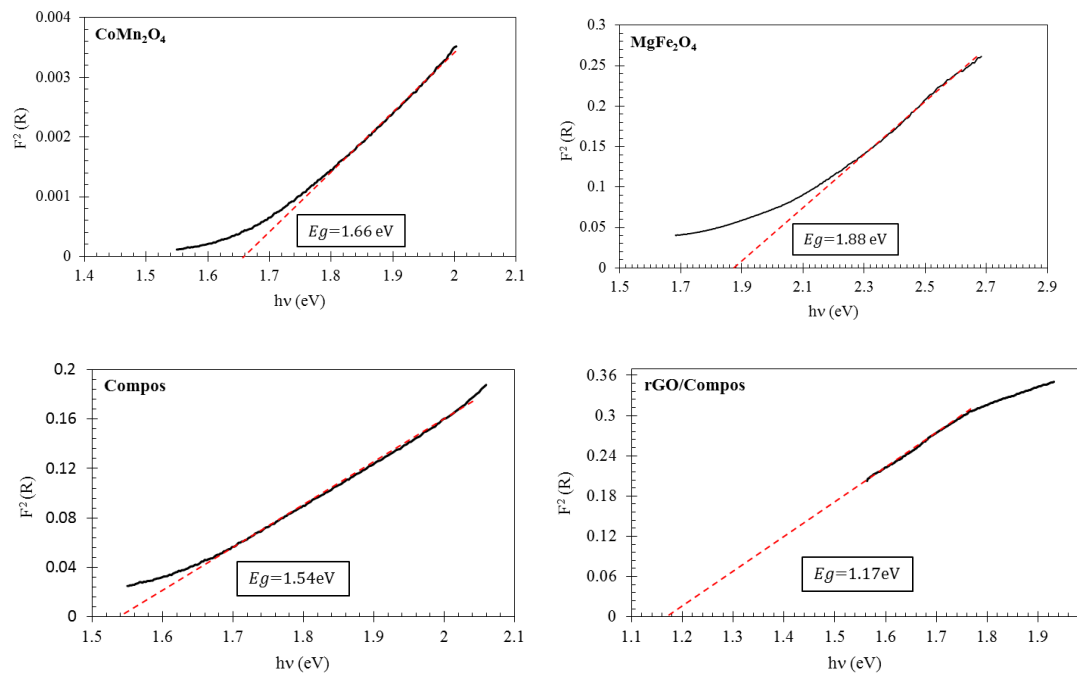

**Figure S12.** Kubelka-Munk diagrams for bandgap determination of the photocatalyst materials under consideration.

**Table S1:** The extent of sulfur adsorbed by the Compos components in the alkaline sulfide solution (0.5 M, initial pH: 11).

| Component                        | S (wt. %) | pH*   |
|----------------------------------|-----------|-------|
| CoMn <sub>2</sub> O <sub>4</sub> | 12.86     | 12.00 |
| MgFe <sub>2</sub> O <sub>4</sub> | 0.22      | 11.22 |

\* measured at the end of the adsorption process.
